# Supplementary material for: Effects of Different Zn2+ Concentrations and High Hydrostatic Pressures (HHP) on Chlorophyll Stability
Source: MDPI journal article supplement (doi:10.3390/foods11142129), 2022-07-18
Supplement: s1 [file s1]

## Supplementary Materials

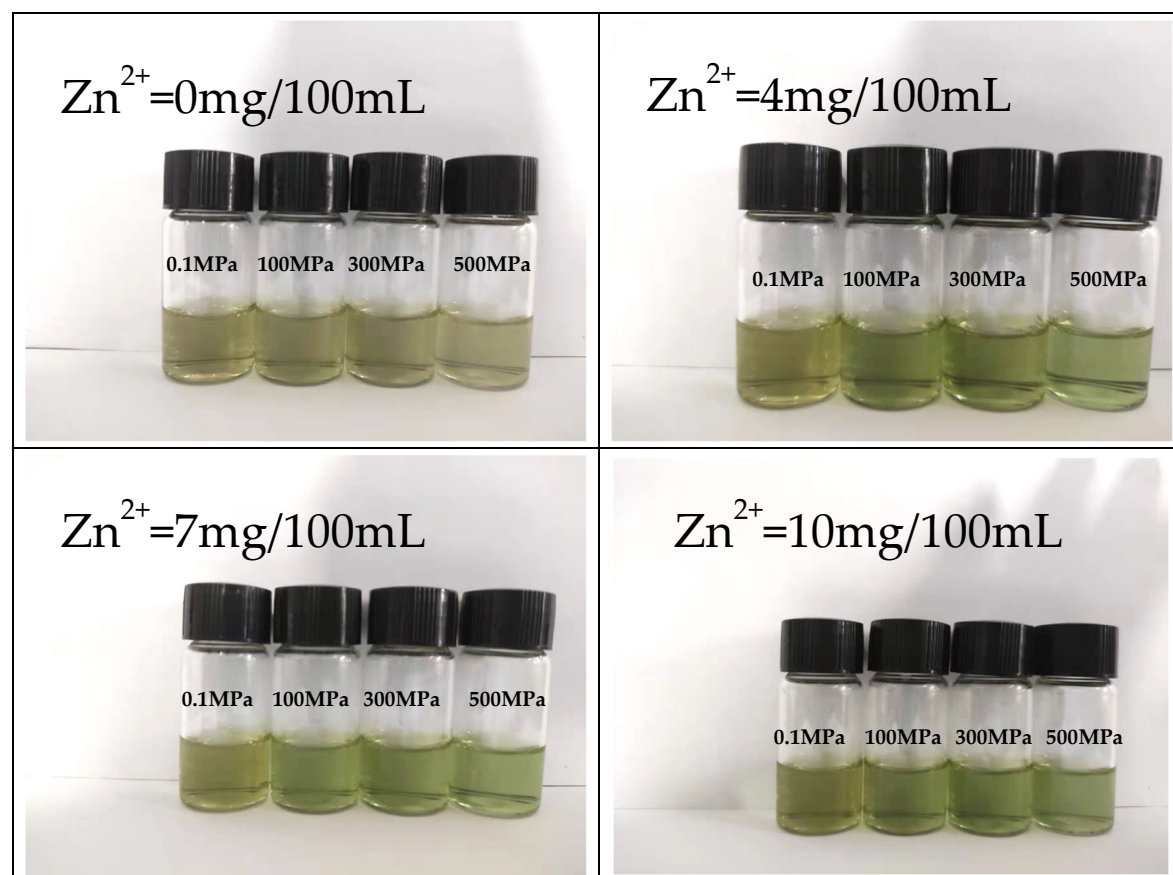

**Figure S1.** Effects of different  $Zn^{2+}$  concentrations and high hydrostatic pressure (HHP) treatment on the appearance of chlorophyll sample solution.

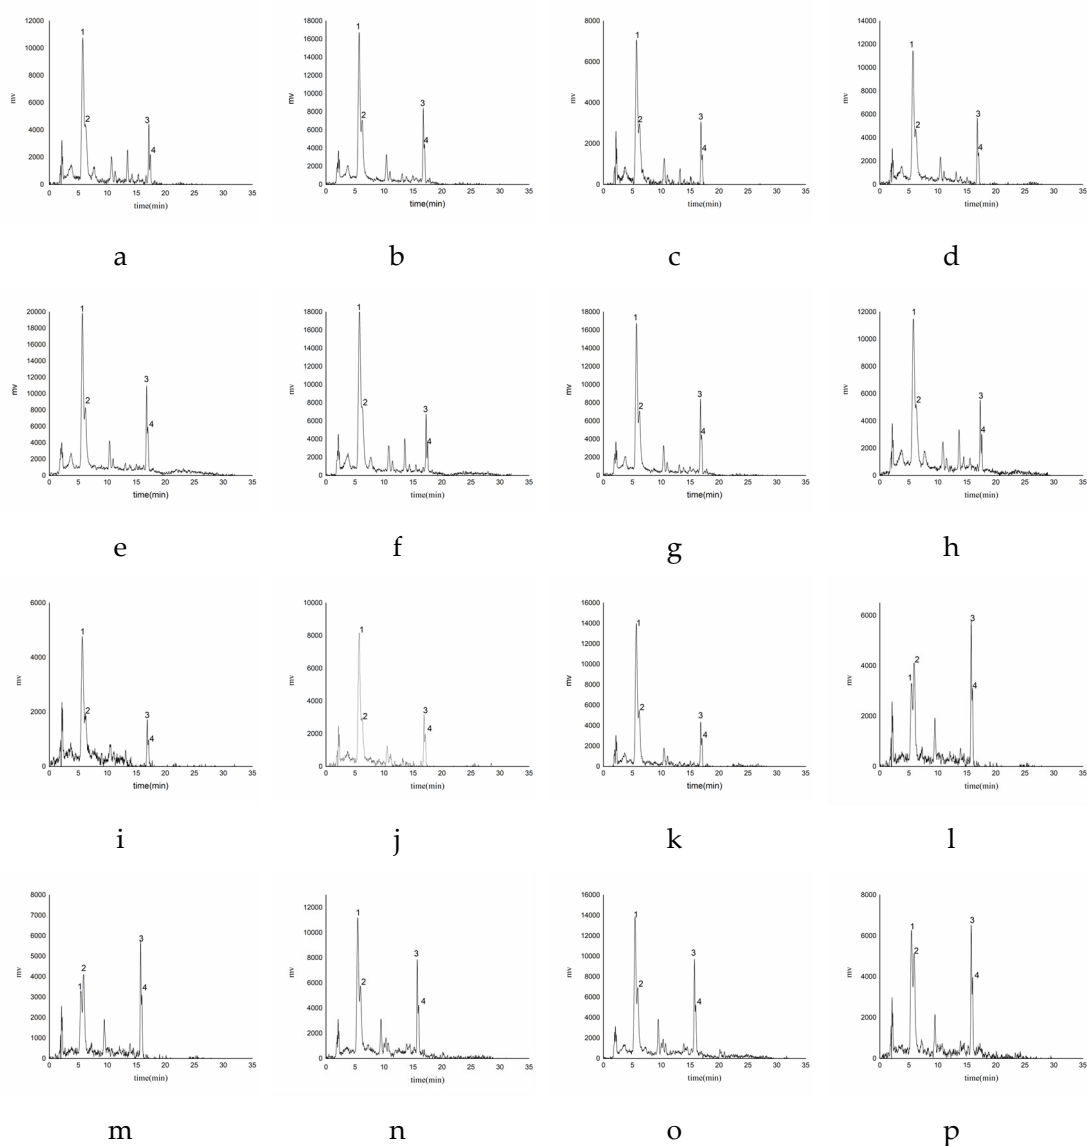

**Figure S2.** HPLC spectra of chlorophyll samples at 665nm after different  $\text{Zn}^{2+}$  concentrations and high hydrostatic pressure (HHP) treatment.

\* a, b, c, and d respectively represent the samples treated at 0.1, 100, 300, and 500MPa when the  $\text{Zn}^{2+}$  concentration is 0mg / 100mL, e, f, g, and h respectively represent the samples treated at 0.1, 100, 300, and 500MPa when the  $\text{Zn}^{2+}$  concentration is 4mg / 100mL, i, j, k, and l respectively represent the samples treated at 0.1, 100, 300, and 500MPa when the  $\text{Zn}^{2+}$  concentration is 7mg / 100mL, m, n, o, and p respectively represent the samples treated at 0.1, 100, 300, and 500MPa when the  $\text{Zn}^{2+}$  concentration is 10mg / 100mL. Peak 1 is the chlorophyll *b*, Peak 2 is the chlorophyll *a*, Peak 3 is the pheophytin *b*, and Peak 4 is the pheophytin *a*.
